# Supplementary material for: Multiplexed Analysis of the Secretin-like GPCR-RAMP Interactome
Source: bioRxiv or medRxiv preprint supplement (doi:10.1101/597690), 2019-04-06
Supplement: Supplementary file [file media-1.pdf]

## 1 **Supplementary Materials**

### 2 **Supplementary Methods**

3  
4 Co-expression analysis: RNA-seq data from 53 tissues provided by 544 donors, with a total of  
5 8555 samples, were downloaded from [gtexportal.org](http://gtexportal.org) (GTEX\_Analysis\_v6p\_RNA-seq\_RNA-  
6 SeQCv1.1.8\_gene\_rpkm.gct.gz) (41). Downloaded data was provided as reads per kilobase per  
7 million mapped reads (RPKM). Only samples passing quality control were included in the  
8 dataset. Read counts and RPKM values were produced with RNA-SeqC; importantly, reads were  
9 mapped to a single gene (see [gtexportal.org](http://gtexportal.org) documentation for more information). For quantile  
10 normalization, gene expression across an individual sample was fit to the averaged distribution  
11 observed across samples. Prior to implementing spearman correlation analysis, the median  
12 normalized expression per tissue was calculated to account for differences in the number of  
13 samples per tissue type. Spearman correlation coefficient was calculated for each RAMP/non-  
14 olfactory GPCR pair. GPCR clusters were assigned as per Fredriksson et al (42).

15  
16 Statistical comparison of data sets: The data obtained using anti-GPCR capture Abs was compared  
17 to the data obtained using the epitope-tag capture methods. Based upon the data set for GPCR-  
18 RAMP complexes derived from the epitope-tag capture Abs, a matrix of hypothetical outcomes for  
19 the data set derived from the anti-GPCR Ab capture strategy was constructed. To compare the two  
20 matrices, the results were converted to binary score matrices (0,1) and the two matrices (epitope-  
21 tag Ab capture *versus* direct Ab capture). A Z-score threshold of 1.645 was applied for the anti-  
22 GPCR Ab data set of 1.645, which corresponds to a confidence interval of 95% for a single-tailed  
23 test (fig S5). The threshold used to convert the summarized and normalized epitope tag data to  
24 binary form was increased by an interval of 0.125 (table S3). The following metrics were plotted  
25 as a function of the threshold used to convert the epitope tag data to a binary matrix: (1) overall  
26 percent agreement ( $P_0$ ), (2) the percent of hits from the epitope tag data that are also found in the

27 anti-GPCR Ab data (sensitivity), (3) the percent of non-hits from the epitope tag data that are also  
 28 non-hits in the anti-GPCR Ab data (specificity), (4) the probability of a positive result in the anti-  
 29 GPCR Ab data also being a positive in the epitope tag data (positive predictive value), (5) the  
 30 probability of a negative result in the anti-GPCR Ab data also being a negative in the epitope tag  
 31 data (negative predictive value) and (6) the similarity of the two data sets (Jaccard Index). The  
 32 formulas used are listed below (TP, true positive; TN, true negative; FP, false positive; TP, true  
 33 positive). See the table below for formulas used.

| Metric                    | Formula                 | Information                                                                         |
|---------------------------|-------------------------|-------------------------------------------------------------------------------------|
| P <sub>0</sub>            | $(TP+TN)/(TP+TN+FP+FN)$ | Overall percent agreement                                                           |
| Sensitivity               | $TP/(TP+FN)$            | Percent of all positives from epitope beads that the anti-GPCR beads detect         |
| Specificity               | $TN/(TN+FP)$            | Percent of all negatives from epitope beads that the anti-GPCR beads detect         |
| Positive Predictive Value | $TP/(TP+FP)$            | Probability of being a positive from epitope beads if anti-GPCR beads says positive |
| Negative Predictive Value | $TN/(TN+FN)$            | Probability of being a negative from epitope beads if anti-GPCR beads says negative |
| Jaccard Index             | $TP/(TP+FP+FN)$         | Similarity of positives between the epitope beads and the anti-GPCR beads           |

34

35 **Supplementary Figures**

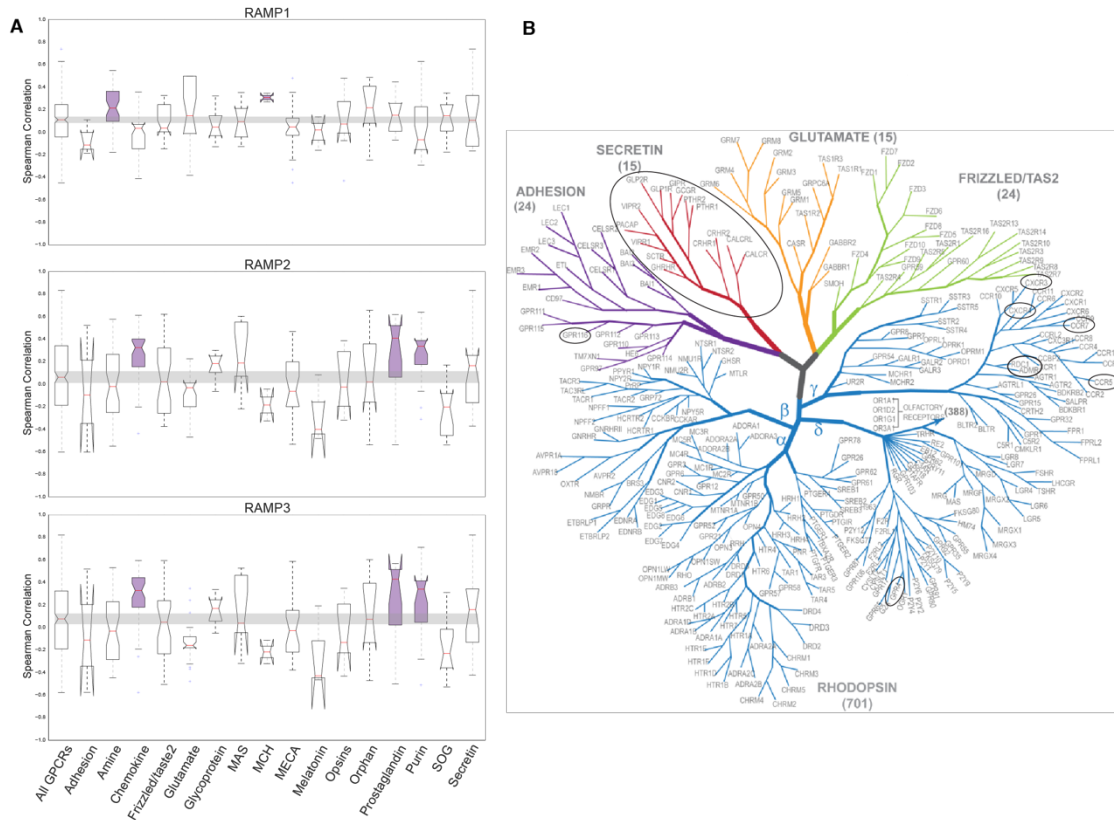

36

37 **Fig S1.** Co-expression of GPCR clusters with RAMPs and the position of selected GPCRs on the  
 38 phylogenetic tree. **(A)** Co-expression of GPCRs clusters with each RAMP in comparison to all  
 39 GPCRs. Boxplot of spearman correlation coefficients across 53 human tissues between RAMP-  
 40 GPCR pairs. Notches indicate 95% confidence intervals of the median and the grey bars indicate  
 41 the 95% confidence interval of the median for all GPCRs. Receptor clusters with significantly  
 42 higher co-expression than all GPCRs are highlighted with purple. Abbreviations: MCH, melanin-  
 43 concentrating hormone; MECA, melanocortin, endothelial differentiation, cannabinoid, and  
 44 adenosine; SOG, somatostatin, opioid, and galanin. **(B)** GPCR phylogenetic tree highlighting the  
 45 receptors tested for complex formation with RAMPs (Figure adapted from (43)). Circled GPCR  
 46 names indicate that the receptor was included in this study. In the phylogenetic tree, ACKR3 is  
 47 referred to as RDC1, GPR182 is ADMR, ADGRF5 is GPR116, and ADCYAP1R1 is PACAP.

48

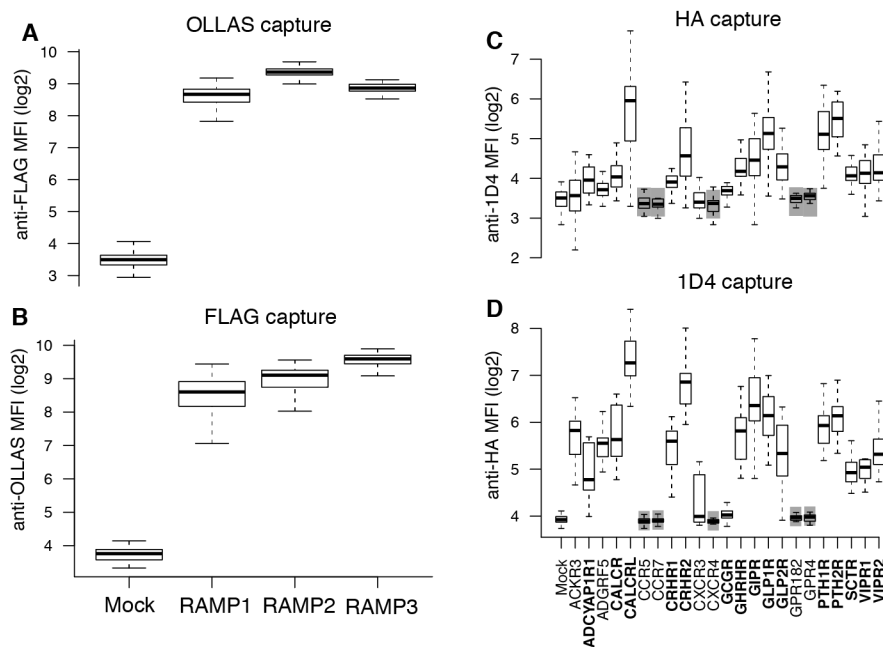

49

50 **Fig. S2.** Validation of epitope tag Abs to capture and detect RAMPs and GPCRs. Lysates from cells  
 51 transfected with each epitope-tagged RAMP construct (FLAG and OLLAS) were incubated with  
 52 the SBA, which included mAbs targeting FLAG or OLLAS. Each RAMP was (A) captured with  
 53 anti-OLLAS mAb bead and detected with PE-conjugated anti-FLAG mAb or (B) captured with  
 54 anti-FLAG mAb bead and detected with a PE-conjugated anti-OLLAS mAb. Lysates from cells  
 55 transfected with each epitope-tagged GPCR construct (HA and/or 1D4) were incubated with the  
 56 SBA, which included mAbs targeting HA or 1D4. Each GPCR was (C) captured with anti-HA mAb  
 57 bead and detected with a PE-conjugated anti-1D4 mAb, or (D) captured with anti-1D4 mAb bead  
 58 and detected with a PE-conjugated anti-HA mAb. Grey boxes around the occasional data set  
 59 indicates that the GPCR does not have both engineered epitope tags, and thus would not be expected  
 60 to show signal in this experiment. The labels in bold correspond to secretin-like GPCRs. Data is  
 61 median fluorescence intensity (MFI) and representative of at least nine experiments performed in  
 62 duplicate. Validated Abs are underlined.

63

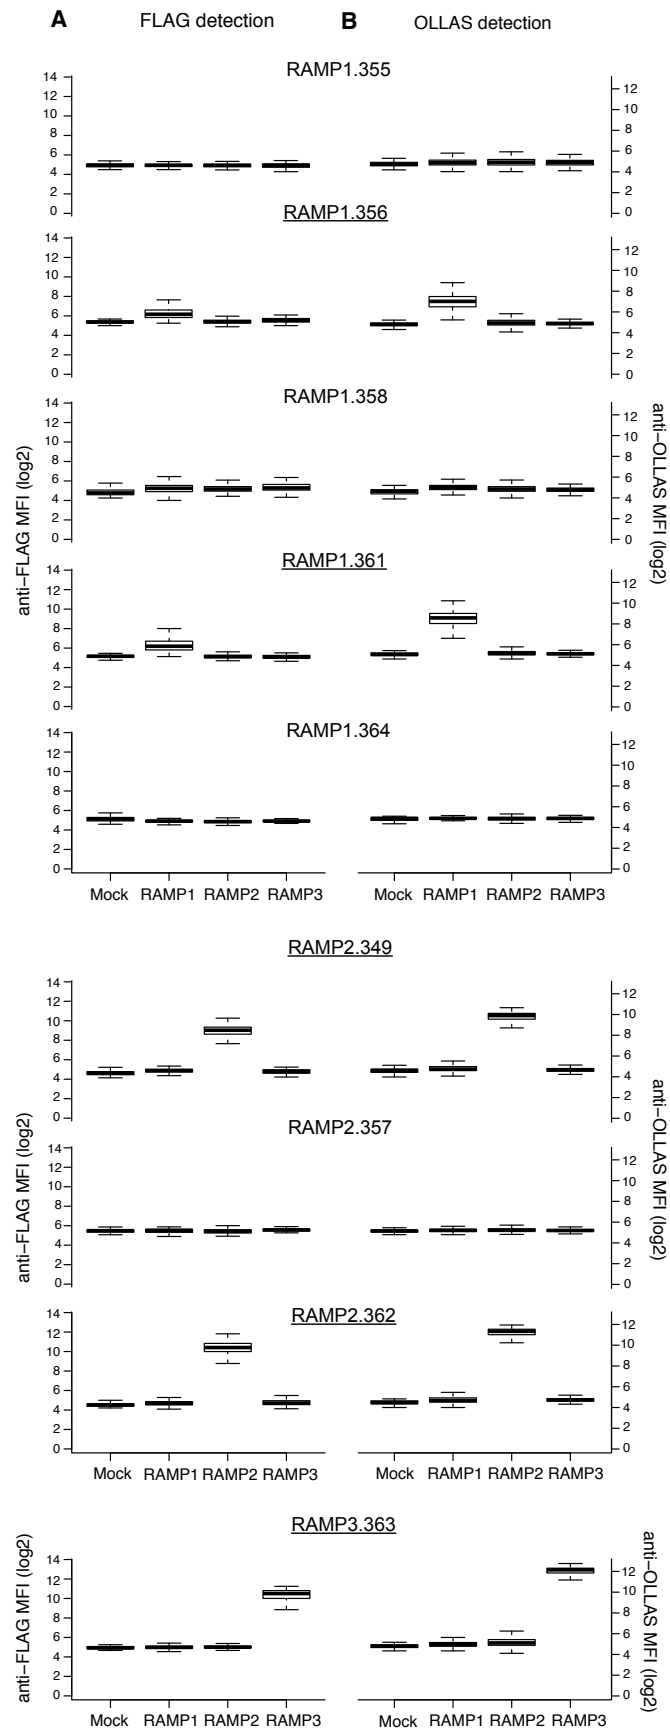

65 **Fig. S3.** Validation of Abs used to capture RAMPs. In order to validate anti-RAMP Abs, lysates  
66 from cells transfected with each epitope-tagged RAMP construct (FLAG and OLLAS) were  
67 incubated with the SBA, which included beads conjugated with nine capture Abs targeting the three  
68 RAMPs. **(A)** PE-conjugated anti-FLAG and **(B)** PE-conjugated anti-OLLAS mAbs were used to  
69 detect any RAMPs captured by the beads. Data are median fluorescence intensity (MFI) and  
70 represent at least 200 experiments, each performed in duplicate. At a statistical significance of  
71  $p \leq 0.05$  (Kruskal-Wallis ANOVA), we validated at least one capture Ab for each of the three RAMP  
72 s (a total of 5 RAMP capture Abs). Bead ID numbers are listed after each RAMP name and the  
73 corresponding Ab name is provided in table S1.

74

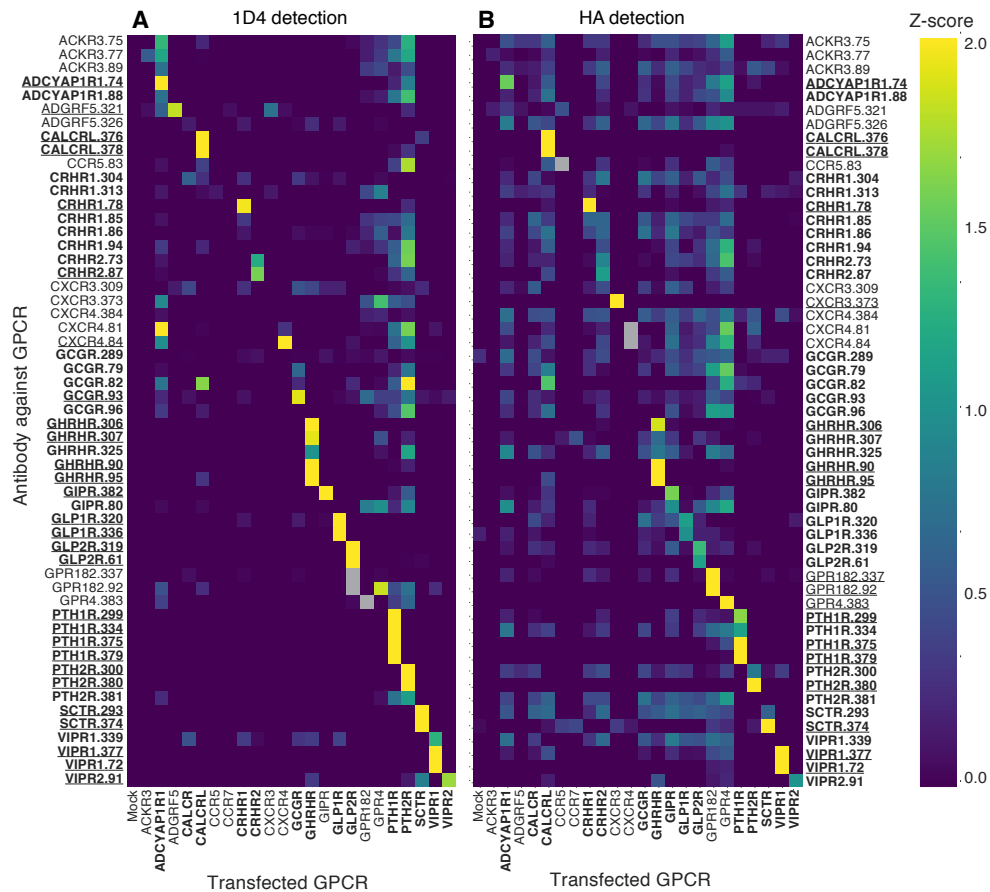

75

76

77

78

79

80

81

82

83

84

85

86

**Fig. S4.** Analysis of anti-GPCR Ab cross-reactivity. Lysates from cells transfected with each epitope-tagged GPCR construct (HA and 1D4) were incubated with the SBA, which included 55 Abs to 21 GPCRs. **(A)** PE-conjugated anti-1D4 and **(B)** PE-conjugated anti-HA were used to detect any GPCRs captured by the beads. The occasional grey boxes indicate that the GPCR did not have the appropriate epitope tag to be detected. The labels in bold correspond to secretin-like GPCRs and validated Abs are underlined Abs. Heatmaps represent the z-scores of median fluorescence intensity (MFI) and indicates the ability of the GPCR Abs to capture each of the 23 GPCRs used in the study. Data represents the median z-score of at least three experiments performed in duplicate. Bead ID numbers are listed after each GPCR name and the corresponding Ab name is provided in table S1.

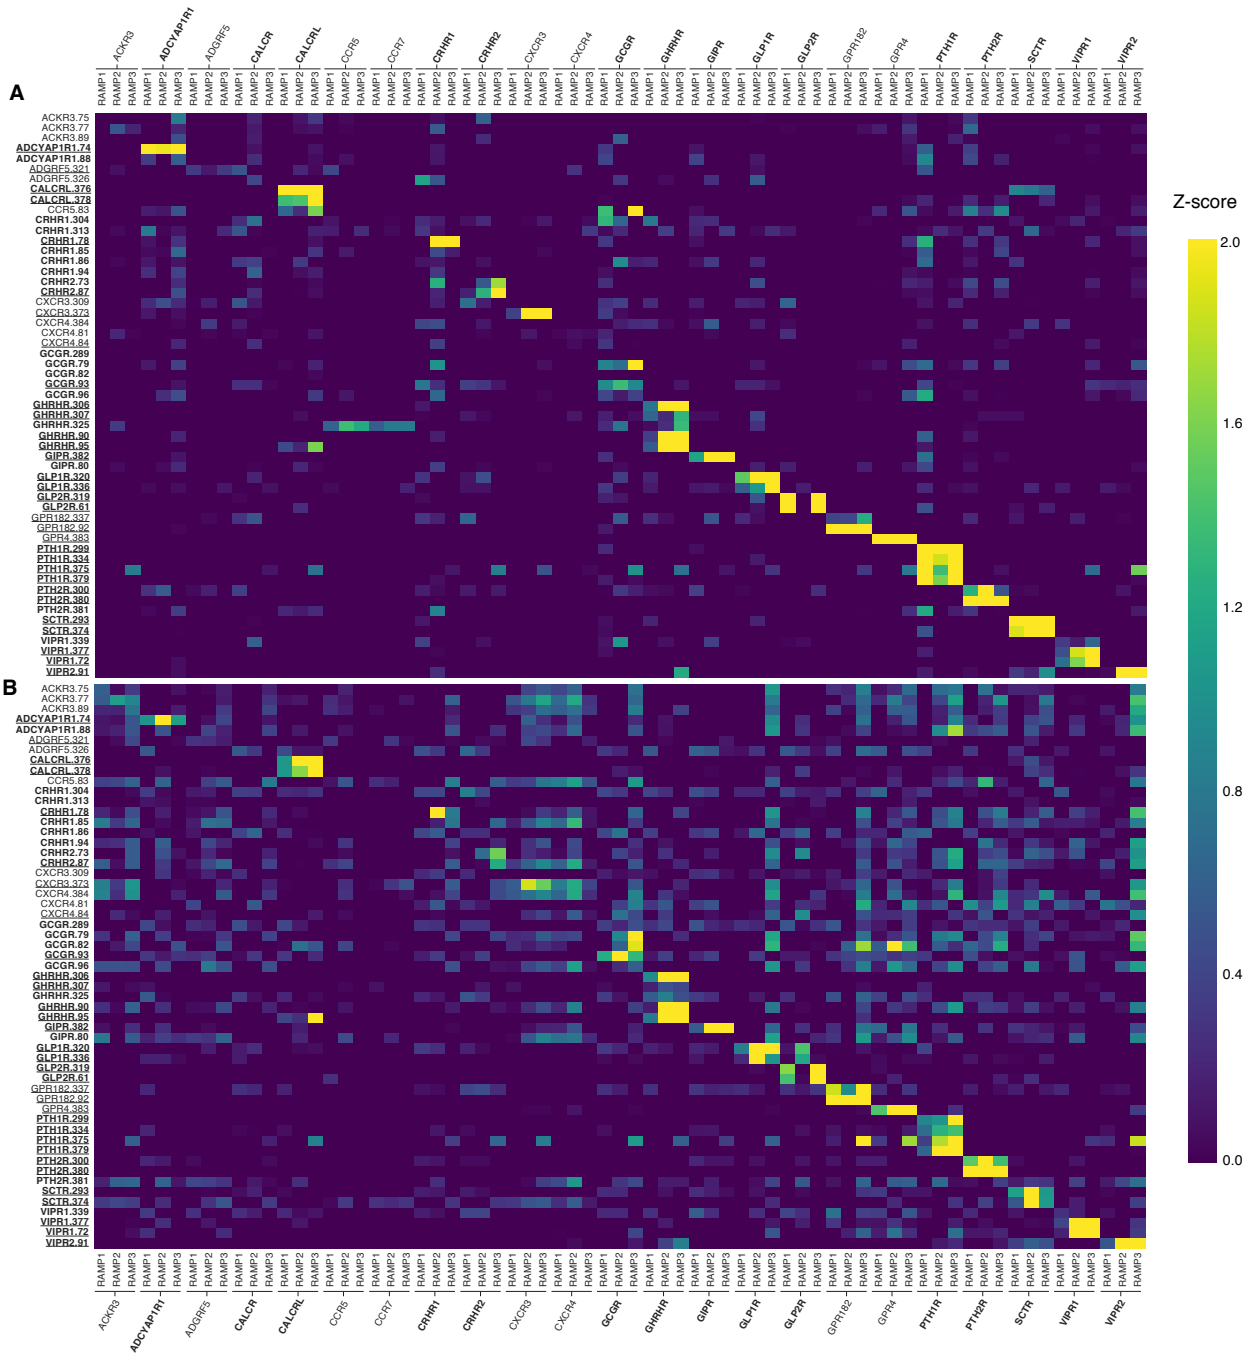

87

88 **Fig. S5.** Detection of GPCR-RAMP complexes following capture by all anti-GPCR Abs. Lysates  
 89 from cells transfected with each epitope-tagged RAMP construct (FLAG and OLLAS) and co-  
 90 transfected with each epitope-tagged GPCR construct (HA and 1D4) were incubated with the  
 91 SBA, which included 55 Abs to the 21 GPCRs included in this study. Complexes were captured  
 92 in multiplex fashion using the anti-GPCR Ab beads. The presence of a GPCR-RAMP complex  
 93 was detected using (A) PE-conjugated OLLAS mAb, or (B) PE-conjugated anti-FLAG mAb. The  
 94 labels in bold correspond to secretin-like GPCRs and validated Abs are underlined. The heatmap



95 displays the Z-score of median fluorescence intensity (MFI) and represents at least three  
96 experiments performed in duplicate. Bead ID numbers are listed after each GPCR name and the  
97 corresponding Ab name is provided in table S1.

98

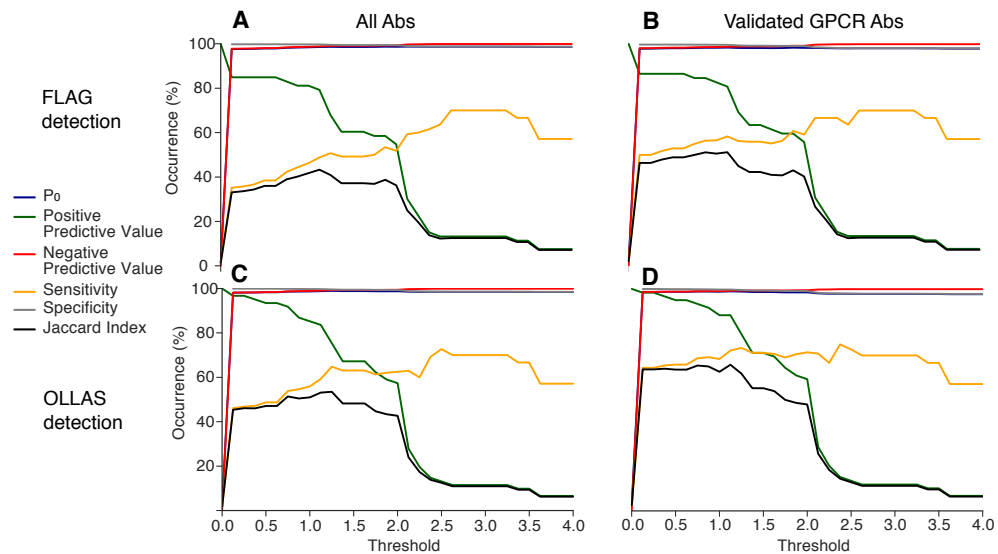

99

00 **Fig. S6.** Statistical validation of GPCR-RAMP SBA data sets. Data from the capture of the GPCR-  
 01 RAMP complexes with anti-epitope mAbs were compared with data obtained from the GPCR-  
 02 RAMP complexes captured using anti-GPCR Abs. PE-conjugated anti-FLAG was used to detect  
 03 GPCR-RAMP complexes captured using (A) all anti-GPCR Abs or (B) validated anti-GPCR Abs.  
 04 Alternatively, PE-conjugated anti-OLLAS mAb was used to detect GPCR-RAMP complexes  
 05 captured using (C) all anti-GPCR Abs or (D) validated anti-GPCR Abs. The Z-score threshold for  
 06 the anti-GPCR Ab data was set at 1.645.  $P_0$  (blue), positive predictive value (green), negative  
 07 predictive value (red), sensitivity (yellow), specificity (grey), and Jaccard Index (black) are plotted  
 08 as a function of increasing threshold for the interaction results using epitope tags for capture and  
 09 detection (Supplemental Table 3). Supplementary Materials and Methods shows the formulas and  
 10 metrics used and provides a narrative description of each of the statistical terms. For example, the  
 11 Jaccard Index represents the overall agreement of the positive results in both data sets and indicates  
 12 at which thresholds the agreement is maximized.

13

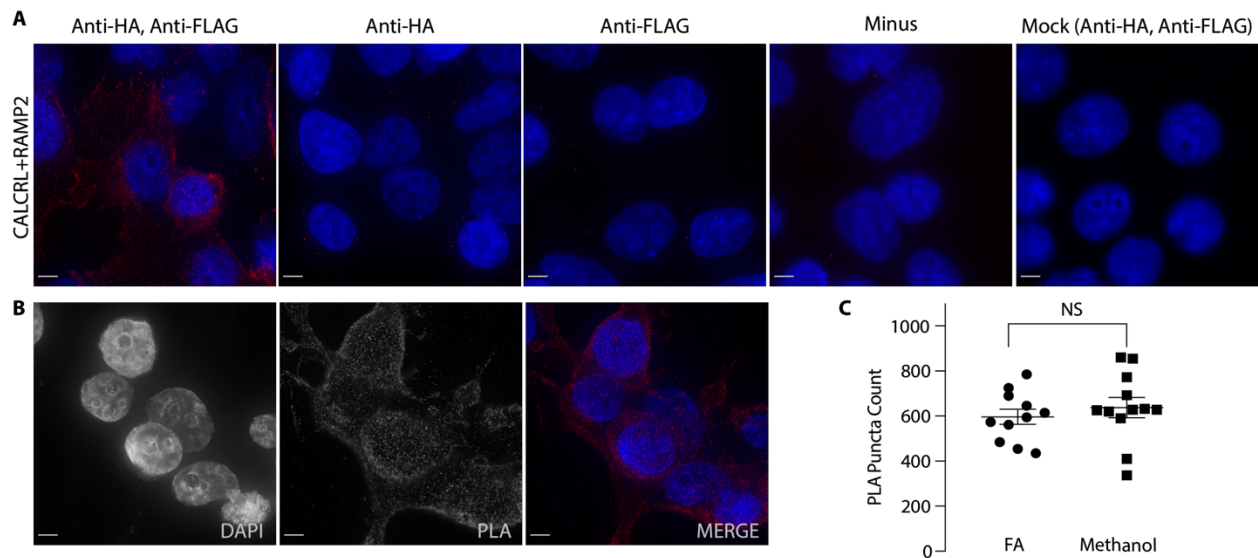

14

15 **Fig. S7.** Detection of CALCRL-RAMP2 interactions in cell membranes using PLA. Cells co-  
 16 transfected with epitope-tagged GPCR and RAMP2 then incubated with anti-HA and anti-FLAG  
 17 Abs. PLA was then carried out to detect GPCR-RAMP2 interactions. (A) Representative images of  
 18 PLA performed on CALCRL+RAMP2 co-transfected cells using Ab detection as noted. Images  
 19 show maximum projection of Z-stack, which is the maximum signal intensity for each channel at  
 20 each point across all slices in the Z-stack. (B) Representative PLA images showing greyscale split-  
 21 channel view of a Z-stack maximum projection for cells co-transfected with CALCRL+RAMP2  
 22 and treated with both primary Abs. The merge is presented in color. Scale bars, 5 $\mu$ m for both (A)  
 23 and (C). Blue = DAPI, red = PLA puncta. (C) PLA puncta counts per cell for cells co-transfected  
 24 with CALCRL+RAMP2, fixed with either FA or methanol and subjected to PLA. Data are from at  
 25 least two experiments performed with at least five replicates. Significance determined by two-tailed  
 26 P-test (P=0.4763, NS = not significant).

27

28 **Table S1.** The ID of the bead coupled to each specific Ab, the source of the Ab, and product code.  
 29 The labels in bold correspond to secretin-like GPCRs. Underlined product codes indicate validated  
 30 Abs.

| Bead ID | Protein Name     | Antibody Source | Product Code     | Bead ID | Protein Name  | Antibody Source | Product Code     |
|---------|------------------|-----------------|------------------|---------|---------------|-----------------|------------------|
| 61      | <b>GLP2R</b>     | HPA             | <u>HPA027929</u> | 321     | ADGRF5        | HPA             | <u>HPA065251</u> |
| 72      | <b>VIPR1</b>     | HPA             | <u>HPA046516</u> | 325     | <b>GHRHR</b>  | HPA             | <u>HPA068576</u> |
| 73      | <b>CRHR2</b>     | HPA             | <u>HPA046683</u> | 326     | ADGRF5        | HPA             | <u>HPA068796</u> |
| 74      | <b>ADCYAP1R1</b> | HPA             | <u>HPA030739</u> | 334     | <b>PTH1R</b>  | HPA             | <u>HPA075879</u> |
| 75      | ACKR3            | HPA             | <u>HPA049718</u> | 336     | <b>GLP1R</b>  | HPA             | <u>HPA077988</u> |
| 77      | ACKR3            | HPA             | <u>HPA032003</u> | 337     | GPR182        | HPA             | <u>HPA027037</u> |
| 78      | <b>CRHR1</b>     | HPA             | <u>HPA063352</u> | 343     | Empty         | N/A             | N/A              |
| 79      | <b>GCGR</b>      | HPA             | <u>HPA066333</u> | 339     | <b>VIPR1</b>  | HPA             | <u>HPA026777</u> |
| 80      | <b>GIPR</b>      | HPA             | <u>HPA068054</u> | 349     | RAMP2         | HPA             | <u>HPA064452</u> |
| 81      | CXCR4            | HPA             | <u>HPA068321</u> | 350     | rabbit IgG    | Bethyl          | P120             |
| 82      | <b>GCGR</b>      | HPA             | <u>HPA071228</u> | 355     | RAMP1         | Abcam           | ab156575         |
| 83      | CCR5             | HPA             | <u>HPA070587</u> | 356     | RAMP1         | HPA             | <u>HPA010654</u> |
| 84      | CXCR4            | HPA             | <u>HPA051623</u> | 357     | RAMP2         | HPA             | <u>HPA052020</u> |
| 85      | <b>CRHR1</b>     | HPA             | <u>HPA055287</u> | 358     | RAMP1         | HPA             | <u>HPA057814</u> |
| 86      | <b>CRHR1</b>     | HPA             | <u>HPA071484</u> | 359     | OLLAS         | In house        | N/A              |
| 87      | <b>CRHR2</b>     | HPA             | <u>HPA073345</u> | 360     | FLAG          | Sigma           | F3165            |
| 88      | <b>ADCYAP1R1</b> | HPA             | <u>HPA073908</u> | 361     | RAMP1         | RnD             | <u>AF6428</u>    |
| 89      | ACKR3            | HPA             | <u>HPA057492</u> | 362     | RAMP2         | RnD             | <u>AF6427</u>    |
| 90      | <b>GHRHR</b>     | <b>HPA</b>      | <u>HPA077545</u> | 363     | RAMP3         | RnD             | <u>AF4875</u>    |
| 91      | <b>VIPR2</b>     | <b>HPA</b>      | <u>HPA062707</u> | 364     | RAMP1         | Santa           | sc-11379         |
| 92      | <b>GPR182</b>    | <b>HPA</b>      | <u>HPA027037</u> | 365     | mouse         | Bio Rad         | PMP01X           |
| 93      | <b>GCGR</b>      | <b>HPA</b>      | <u>HPA057075</u> | 366     | 1D4           | In house        | N/A              |
| 94      | <b>CRHR1</b>     | <b>HPA</b>      | <u>HPA046066</u> | 367     | HA            | Biologend       | 16B12            |
| 95      | <b>GHRHR</b>     | <b>HPA</b>      | <u>HPA070884</u> | 373     | CXCR3         | HPA             | <u>HPA003189</u> |
| 96      | <b>GCGR</b>      | <b>HPA</b>      | <u>HPA074345</u> | 374     | <b>SCTR</b>   | HPA             | <u>HPA007269</u> |
| 293     | <b>SCTR</b>      | <b>HPA</b>      | <u>HPA007312</u> | 375     | <b>PTH1R</b>  | HPA             | <u>HPA007491</u> |
| 299     | <b>PTH1R</b>     | <b>HPA</b>      | <u>HPA007978</u> | 376     | <b>CALCRL</b> | HPA             | <u>HPA007586</u> |
| 300     | <b>PTH2R</b>     | <b>HPA</b>      | <u>HPA010534</u> | 377     | <b>VIPR1</b>  | HPA             | <u>HPA007588</u> |
| 304     | <b>CRHR1</b>     | <b>HPA</b>      | <u>HPA032018</u> | 378     | <b>CALCRL</b> | HPA             | <u>HPA008070</u> |
| 306     | <b>GHRHR</b>     | <b>HPA</b>      | <u>HPA034645</u> | 379     | <b>PTH1R</b>  | HPA             | <u>HPA007978</u> |
| 307     | <b>GHRHR</b>     | <b>HPA</b>      | <u>HPA034644</u> | 380     | <b>PTH2R</b>  | HPA             | <u>HPA010534</u> |
| 309     | CXCR3            | HPA             | <u>HPA045942</u> | 381     | <b>PTH2R</b>  | HPA             | <u>HPA010655</u> |
| 313     | <b>CRHR1</b>     | <b>HPA</b>      | <u>HPA052441</u> | 382     | <b>GIPR</b>   | HPA             | <u>HPA017428</u> |
| 319     | <b>GLP2R</b>     | <b>HPA</b>      | <u>HPA064671</u> | 383     | GPR4          | HPA             | <u>HPA019207</u> |
| 320     | <b>GLP1R</b>     | <b>HPA</b>      | <u>HPA065175</u> | 384     | CXCR4         | HPA             | <u>HPA027832</u> |

31

32 **Table S2.** Statistical significance of GPCR-RAMP complex formation using epitope tags for  
 33 capture. The statistical significance of signal between mock transfected cell lysates and lysates  
 34 from cells co-transfected with each dual-tagged RAMP construct plus each dual or single-tagged  
 35 GPCR construct. (Ordinary one-way ANOVA, Dunnett's multiple comparisons test). N/A  
 36 indicates that the GPCR does not have the epitope tag to be captured or detected with the  
 37 corresponding Ab. Secretin-like receptors are shown in bold.

| Capture Ab       | Interaction with RAMP1 |       |       |       |       |       |       |       |
|------------------|------------------------|-------|-------|-------|-------|-------|-------|-------|
|                  | 1D4                    | 1D4   | HA    | HA    | OLLAS | OLLAS | FLAG  | FLAG  |
| Detection Ab     | FLAG                   | OLLAS | FLAG  | OLLAS | 1D4   | HA    | 1D4   | HA    |
| ACKR3            | 0.857                  | 0.804 | 1.000 | 1.000 | 0.999 | 1.000 | 1.000 | 1.000 |
| <b>ADCYAP1R1</b> | 0.204                  | 0.025 | 1.000 | 1.000 | 0.001 | 1.000 | 0.000 | 1.000 |
| ADGRF5           | 0.392                  | 0.017 | 1.000 | 1.000 | 0.706 | 1.000 | 0.907 | 1.000 |
| <b>CALCR</b>     | 0.079                  | 0.002 | 1.000 | 1.000 | 0.986 | 1.000 | 0.994 | 1.000 |
| <b>CALCRL</b>    | 0.000                  | 0.000 | 0.000 | 0.000 | 0.000 | 0.000 | 0.000 | 0.000 |
| CCR5             | 1.000                  | 1.000 | N/A   | N/A   | 1.000 | N/A   | 1.000 | N/A   |
| CCR7             | 1.000                  | 1.000 | N/A   | N/A   | 1.000 | N/A   | 1.000 | N/A   |
| <b>CRHR1</b>     | 0.999                  | 0.999 | 1.000 | 1.000 | 1.000 | 1.000 | 1.000 | 1.000 |
| <b>CRHR2</b>     | 0.927                  | 0.808 | 0.999 | 1.000 | 0.994 | 1.000 | 0.999 | 0.999 |
| CXCR3            | 0.999                  | 0.969 | 1.000 | 1.000 | 0.999 | 1.000 | 1.000 | 1.000 |
| CXCR4            | 0.999                  | 0.999 | 1.000 | 1.000 | 1.000 | 1.000 | 1.000 | 1.000 |
| <b>GCGR</b>      | 0.016                  | 0.000 | 1.000 | 0.999 | 0.904 | 1.000 | 0.855 | 1.000 |
| <b>GHRHR</b>     | 0.280                  | 0.069 | 0.999 | 1.000 | 0.158 | 1.000 | 0.491 | 0.999 |
| <b>GIPR</b>      | 0.000                  | 0.000 | 0.447 | 0.999 | 0.053 | 0.994 | 0.028 | 0.603 |
| <b>GLP1R</b>     | 0.000                  | 0.000 | 0.170 | 0.821 | 0.000 | 0.999 | 0.000 | 0.884 |
| <b>GLP2R</b>     | 0.000                  | 0.000 | 0.944 | 1.000 | 0.000 | 0.995 | 0.000 | 0.494 |
| GPR182           | N/A                    | N/A   | 0.000 | 0.275 | N/A   | 0.023 | N/A   | 0.000 |
| GPR4             | N/A                    | N/A   | 0.000 | 0.440 | N/A   | 0.003 | N/A   | 0.000 |
| <b>PTH1R</b>     | 0.000                  | 0.000 | 0.690 | 0.721 | 0.000 | 0.995 | 0.000 | 0.864 |
| <b>PTH2R</b>     | 0.000                  | 0.000 | 0.005 | 0.302 | 0.000 | 0.879 | 0.000 | 0.244 |
| <b>SCTR</b>      | 0.032                  | 0.000 | 1.000 | 0.999 | 0.000 | 0.975 | 0.000 | 1.000 |
| <b>VIPR1</b>     | 0.630                  | 0.181 | 1.000 | 0.999 | 0.073 | 1.000 | 0.106 | 1.000 |
| <b>VIPR2</b>     | 0.003                  | 0.087 | 0.999 | 1.000 | 0.632 | 1.000 | 0.611 | 1.000 |

| Capture Ab       | Interaction with RAMP2 |       |       |       |       |       |       |       |
|------------------|------------------------|-------|-------|-------|-------|-------|-------|-------|
|                  | 1D4                    | 1D4   | HA    | HA    | OLLAS | OLLAS | FLAG  | FLAG  |
| Detection Ab     | FLAG                   | OLLAS | FLAG  | OLLAS | 1D4   | HA    | 1D4   | HA    |
| ACKR3            | 0.000                  | 0.000 | 0.988 | 1.000 | 0.907 | 1.000 | 0.070 | 0.999 |
| <b>ADCYAP1R1</b> | 0.060                  | 0.021 | 1.000 | 1.000 | 0.062 | 1.000 | 0.000 | 1.000 |
| ADGRF5           | 0.000                  | 0.000 | 1.000 | 0.999 | 0.987 | 1.000 | 0.977 | 1.000 |
| <b>CALCR</b>     | 0.000                  | 0.000 | 0.958 | 0.985 | 0.994 | 1.000 | 0.456 | 0.999 |
| <b>CALCRL</b>    | 0.000                  | 0.000 | 0.000 | 0.000 | 0.000 | 0.000 | 0.000 | 0.000 |
| CCR5             | 0.408                  | 0.153 | N/A   | N/A   | 0.999 | N/A   | 0.999 | N/A   |

|              |       |       |       |       |       |       |       |       |
|--------------|-------|-------|-------|-------|-------|-------|-------|-------|
| CCR7         | 0.995 | 0.418 | N/A   | N/A   | 0.975 | N/A   | 0.999 | N/A   |
| <b>CRHR1</b> | 0.001 | 0.000 | 0.994 | 0.999 | 0.999 | 1.000 | 0.988 | 1.000 |
| <b>CRHR2</b> | 0.471 | 0.115 | 0.041 | 1.000 | 0.986 | 1.000 | 0.883 | 0.869 |
| CXCR3        | 0.988 | 0.782 | 0.995 | 0.995 | 1.000 | 1.000 | 1.000 | 0.995 |
| CXCR4        | 0.999 | 0.999 | 1.000 | 1.000 | 1.000 | 1.000 | 1.000 | 1.000 |
| <b>GCGR</b>  | 0.000 | 0.000 | 1.000 | 1.000 | 0.999 | 1.000 | 0.501 | 1.000 |
| <b>GHRHR</b> | 0.000 | 0.000 | 0.709 | 1.000 | 0.956 | 1.000 | 0.210 | 0.999 |
| <b>GIPR</b>  | 0.000 | 0.000 | 0.000 | 0.021 | 0.000 | 0.941 | 0.000 | 0.816 |
| <b>GLP1R</b> | 0.000 | 0.000 | 0.009 | 0.556 | 0.003 | 0.996 | 0.000 | 0.827 |
| <b>GLP2R</b> | 0.000 | 0.000 | 0.021 | 0.982 | 0.000 | 0.994 | 0.000 | 0.984 |
| GPR182       | N/A   | N/A   | 0.000 | 0.000 | N/A   | 0.000 | N/A   | 0.000 |
| GPR4         | N/A   | N/A   | 0.000 | 0.000 | N/A   | 0.000 | N/A   | 0.000 |
| <b>PTH1R</b> | 0.000 | 0.000 | 0.095 | 0.966 | 0.000 | 0.989 | 0.000 | 0.712 |
| <b>PTH2R</b> | 0.000 | 0.000 | 0.065 | 0.090 | 0.000 | 0.254 | 0.000 | 0.648 |
| <b>SCTR</b>  | 0.001 | 0.000 | 0.999 | 0.925 | 0.000 | 0.944 | 0.000 | 0.999 |
| <b>VIPR1</b> | 0.030 | 0.002 | 0.995 | 0.995 | 0.016 | 1.000 | 0.000 | 0.999 |
| <b>VIPR2</b> | 0.000 | 0.000 | 0.995 | 0.984 | 0.167 | 1.000 | 0.002 | 0.999 |

| Interaction with RAMP3 |       |       |       |       |       |       |       |       |
|------------------------|-------|-------|-------|-------|-------|-------|-------|-------|
| Capture Ab             | 1D4   | 1D4   | HA    | HA    | OLLAS | OLLAS | FLAG  | FLAG  |
| Detection Ab           | FLAG  | OLLAS | FLAG  | OLLAS | 1D4   | HA    | 1D4   | HA    |
| ACKR3                  | 0.001 | 0.000 | 1.000 | 1.000 | 0.999 | 0.999 | 0.999 | 0.999 |
| <b>ADCYAP1R1</b>       | 0.024 | 0.000 | 1.000 | 1.000 | 0.005 | 0.981 | 0.190 | 0.999 |
| ADGRF5                 | 0.016 | 0.000 | 1.000 | 1.000 | 0.820 | 0.999 | 0.999 | 1.000 |
| <b>CALCR</b>           | 0.000 | 0.000 | 1.000 | 0.983 | 0.281 | 0.996 | 0.923 | 0.999 |
| <b>CALCRL</b>          | 0.000 | 0.000 | 0.000 | 0.063 | 0.000 | 0.000 | 0.000 | 0.000 |
| CCR5                   | 0.999 | 0.995 | N/A   | N/A   | 1.000 | N/A   | 1.000 | N/A   |
| CCR7                   | 0.999 | 0.551 | N/A   | N/A   | 0.994 | N/A   | 0.999 | N/A   |
| <b>CRHR1</b>           | 0.123 | 0.000 | 1.000 | 1.000 | 0.999 | 1.000 | 0.999 | 1.000 |
| <b>CRHR2</b>           | 0.008 | 0.000 | 0.999 | 0.977 | 0.157 | 0.995 | 0.817 | 0.586 |
| CXCR3                  | 0.885 | 0.039 | 0.999 | 0.999 | 1.000 | 1.000 | 1.000 | 1.000 |
| CXCR4                  | 1.000 | 0.999 | 1.000 | 1.000 | 1.000 | 1.000 | 1.000 | 1.000 |
| <b>GCGR</b>            | 0.000 | 0.000 | 1.000 | 1.000 | 0.297 | 0.999 | 0.776 | 1.000 |
| <b>GHRHR</b>           | 0.000 | 0.000 | 0.999 | 0.999 | 0.017 | 0.925 | 0.147 | 0.740 |
| <b>GIPR</b>            | 0.000 | 0.000 | 0.961 | 0.999 | 0.016 | 0.063 | 0.193 | 0.736 |
| <b>GLP1R</b>           | 0.000 | 0.000 | 0.964 | 0.372 | 0.040 | 0.306 | 0.017 | 0.522 |
| <b>GLP2R</b>           | 0.000 | 0.000 | 1.000 | 0.999 | 0.000 | 0.050 | 0.000 | 0.569 |
| GPR182                 | N/A   | N/A   | 0.000 | 0.000 | N/A   | 0.000 | N/A   | 0.000 |
| GPR4                   | N/A   | N/A   | 0.000 | 0.000 | N/A   | 0.000 | N/A   | 0.000 |
| <b>PTH1R</b>           | 0.000 | 0.000 | 0.809 | 0.633 | 0.000 | 0.451 | 0.000 | 0.034 |
| <b>PTH2R</b>           | 0.000 | 0.000 | 0.350 | 0.141 | 0.000 | 0.078 | 0.000 | 0.145 |
| <b>SCTR</b>            | 0.003 | 0.000 | 1.000 | 0.995 | 0.000 | 0.955 | 0.000 | 0.984 |
| <b>VIPR1</b>           | 0.000 | 0.000 | 0.999 | 0.860 | 0.001 | 0.965 | 0.043 | 0.999 |
| <b>VIPR2</b>           | 0.000 | 0.000 | 0.933 | 0.926 | 0.000 | 0.862 | 0.001 | 0.911 |

39 **Table S3.** Overall statistic for GPCR-RAMP complex formation. P-values from table S3 of  
 40 <0.0001 were assigned 4, <0.001 a 3, <0.01 a 2, and <0.05 a 1. The values were summed and  
 41 divided by the number of capture and detection pairs that we expected to be capable of measuring  
 42 the relevant complex. For dual-tagged GPCRs, we divided by eight and for single-tagged GPCRs  
 43 we divided by four to obtain a normalized value. Secretin-like receptors are shown in bold.

|                  | RAMP1 | RAMP2 | RAMP3 |
|------------------|-------|-------|-------|
| ACKR3            | 0     | 1.125 | 0.75  |
| <b>ADCYAP1R1</b> | 1     | 0.75  | 0.75  |
| ADGRF5           | 0.125 | 0.875 | 0.625 |
| <b>CALCR</b>     | 0.25  | 1     | 1     |
| <b>CALCRL</b>    | 4     | 4     | 3.5   |
| CCR5             | 0     | 0     | 0     |
| CCR7             | 0     | 0     | 0     |
| <b>CRHR1</b>     | 0     | 0.625 | 0.375 |
| <b>CRHR2</b>     | 0     | 0     | 0.75  |
| CXCR3            | 0     | 0     | 0.25  |
| CXCR4            | 0     | 0     | 0     |
| <b>GCGR</b>      | 0.625 | 1     | 2     |
| <b>GHRHR</b>     | 0     | 2     | 1.125 |
| <b>GIPR</b>      | 1.125 | 2.375 | 1.125 |
| <b>GLP1R</b>     | 1.75  | 1.875 | 1.25  |
| <b>GLP2R</b>     | 2     | 2     | 2     |
| GPR182           | 2.25  | 2.25  | 4     |
| GPR4             | 2.5   | 3.25  | 4     |
| <b>PTH1R</b>     | 2     | 2     | 2.125 |
| <b>PTH2R</b>     | 2.25  | 2     | 2.125 |
| <b>SCTR</b>      | 1.625 | 2     | 1.75  |
| <b>VIPR1</b>     | 0     | 1.125 | 1.25  |
| <b>VIPR2</b>     | 0.25  | 1.25  | 1.625 |

44
